# Supplementary material for: Investigation of the Impact of CYP3A5 Polymorphism on Drug–Drug Interaction between Tacrolimus and Schisantherin A/Schisandrin A Based on Physiologically-Based Pharmacokinetic Modeling
Source: PubMed Central journal article supplement (PMC7997453; doi:10.3390/ph14030198), 2021-02-27
Supplement: pharmaceuticals-14-00198-s001.pdf [file pharmaceuticals-14-00198-s001.pdf]

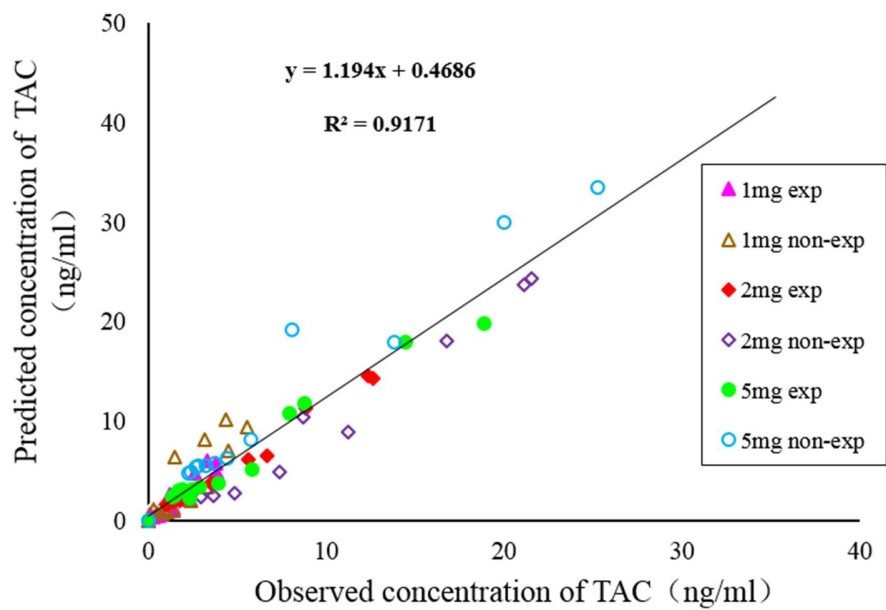

**Figure S1.** Linear analysis of the predicted concentration and observed concentration of tacrolimus

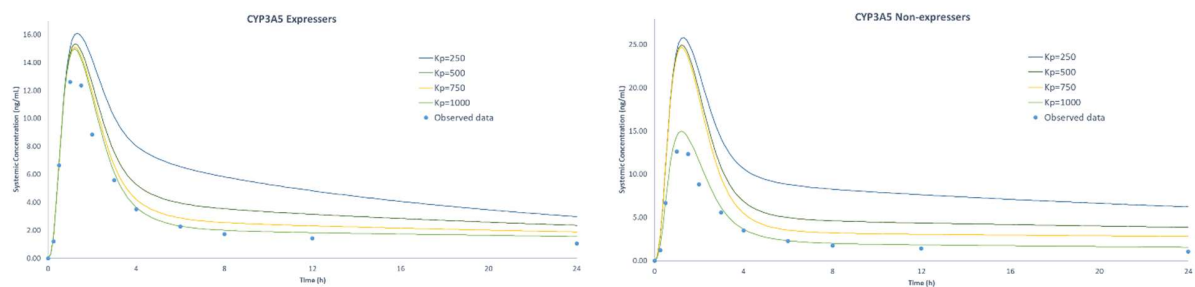

**Figure S2.** Sensitivity analysis of adipose distribution on tacrolimus pharmacokinetics in CYP3A5 expressers and non-expressers. Blood concentration of tacrolimus following a single oral dose of 2 mg was simulated with  $K_p$  value of adipose tissue varying from 250 to 1000 by 250.

**Table S1** Data points for RI and TDI assays with mean and standard variation values

| <b>Figure 2A</b> |                                         |           |                                         |           |                                         |           |                                         |           |                                |           |
|------------------|-----------------------------------------|-----------|-----------------------------------------|-----------|-----------------------------------------|-----------|-----------------------------------------|-----------|--------------------------------|-----------|
|                  | <b>0.2 <math>\mu</math>M tacrolimus</b> |           | <b>0.4 <math>\mu</math>M tacrolimus</b> |           | <b>0.8 <math>\mu</math>M tacrolimus</b> |           | <b>1.6 <math>\mu</math>M tacrolimus</b> |           |                                |           |
| <b>STA</b>       | <b>Mean</b>                             | <b>SD</b> | <b>Mean</b>                             | <b>SD</b> | <b>Mean</b>                             | <b>SD</b> | <b>Mean</b>                             | <b>SD</b> |                                |           |
| 0 $\mu$ M        | 8.5682                                  | 0.1101    | 7.3548                                  | 1.2723    | 4.5004                                  | 0.1763    | 2.3328                                  | 0.0625    |                                |           |
| 0.125 $\mu$ M    | 17.0000                                 | 1.0000    | 9.0441                                  | 1.0494    | 7.1353                                  | 0.6206    | 2.6233                                  | 0.6790    |                                |           |
| 0.25 $\mu$ M     | 21.0000                                 | 1.0000    | 14.8861                                 | 0.4893    | 8.3071                                  | 0.6418    | 3.9072                                  | 0.6564    |                                |           |
| 0.5 $\mu$ M      | 35.0000                                 | 3.0000    | 23.9051                                 | 1.2189    | 13.9244                                 | 1.6474    | 5.0160                                  | 0.7723    |                                |           |
| <b>Figure 2B</b> |                                         |           |                                         |           |                                         |           |                                         |           |                                |           |
|                  | <b>0.2 <math>\mu</math>M tacrolimus</b> |           | <b>0.4 <math>\mu</math>M tacrolimus</b> |           | <b>0.8 <math>\mu</math>M tacrolimus</b> |           | <b>1.6 <math>\mu</math>M tacrolimus</b> |           |                                |           |
| <b>STA</b>       | <b>Mean</b>                             | <b>SD</b> | <b>Mean</b>                             | <b>SD</b> | <b>Mean</b>                             | <b>SD</b> | <b>Mean</b>                             | <b>SD</b> |                                |           |
| 0 $\mu$ M        | 8.0000                                  | 2.7759    | 7.5682                                  | 0.1101    | 6.3548                                  | 1.2723    | 5.1363                                  | 1.1036    |                                |           |
| 0.125 $\mu$ M    | 15.0000                                 | 0.3663    | 14.0109                                 | 1.4711    | 7.5773                                  | 1.6034    | 5.6992                                  | 0.6790    |                                |           |
| 0.25 $\mu$ M     | 23.2012                                 | 1.0138    | 15.6487                                 | 0.8529    | 12.0521                                 | 2.6740    | 5.8700                                  | 0.6564    |                                |           |
| 0.5 $\mu$ M      | 30.8928                                 | 3.5033    | 26.2841                                 | 1.6422    | 14.9975                                 | 2.4334    | 8.0120                                  | 0.7723    |                                |           |
| <b>Figure 2C</b> |                                         |           |                                         |           |                                         |           |                                         |           |                                |           |
|                  | <b>0.2 <math>\mu</math>M tacrolimus</b> |           | <b>0.4 <math>\mu</math>M tacrolimus</b> |           | <b>0.8 <math>\mu</math>M tacrolimus</b> |           | <b>1.6 <math>\mu</math>M tacrolimus</b> |           |                                |           |
| <b>SIA</b>       | <b>Mean</b>                             | <b>SD</b> | <b>Mean</b>                             | <b>SD</b> | <b>Mean</b>                             | <b>SD</b> | <b>Mean</b>                             | <b>SD</b> |                                |           |
| 0 $\mu$ M        | 19.7089                                 | 0.5288    | 9.0000                                  | 1.4052    | 5.2438                                  | 1.4052    | 1.5764                                  | 1.1963    |                                |           |
| 2.4 $\mu$ M      | 20.0000                                 | 1.1414    | 10.0000                                 | 0.8362    | 3.3452                                  | 0.8362    | 1.4662                                  | 0.0139    |                                |           |
| 7.2 $\mu$ M      | 18.8974                                 | 1.8284    | 10.0565                                 | 1.1621    | 3.6950                                  | 1.1621    | 1.7598                                  | 0.1414    |                                |           |
| 12 $\mu$ M       | 20.3445                                 | 1.2828    | 9.8175                                  | 1.2527    | 4.5304                                  | 1.2327    | 1.6431                                  | 0.0012    |                                |           |
| <b>Figure 2D</b> |                                         |           |                                         |           |                                         |           |                                         |           |                                |           |
|                  | <b>0.2 <math>\mu</math>M tacrolimus</b> |           | <b>0.4 <math>\mu</math>M tacrolimus</b> |           | <b>0.8 <math>\mu</math>M tacrolimus</b> |           | <b>1.6 <math>\mu</math>M tacrolimus</b> |           |                                |           |
| <b>SIA</b>       | <b>Mean</b>                             | <b>SD</b> | <b>Mean</b>                             | <b>SD</b> | <b>Mean</b>                             | <b>SD</b> | <b>Mean</b>                             | <b>SD</b> |                                |           |
| 0 $\mu$ M        | 28.0000                                 | 2.0288    | 14.9302                                 | 3.4052    | 8.4000                                  | 1.4052    | 4.4803                                  | 1.1963    |                                |           |
| 2.4 $\mu$ M      | 32.0000                                 | 1.1414    | 17.6167                                 | 0.8362    | 9.2000                                  | 0.8362    | 6.2790                                  | 0.0139    |                                |           |
| 7.2 $\mu$ M      | 43.0000                                 | 3.8284    | 21.6176                                 | 1.1621    | 12.0300                                 | 1.1621    | 6.9243                                  | 0.1414    |                                |           |
| 12 $\mu$ M       | 60.0000                                 | 2.8284    | 30.1990                                 | 3.2527    | 15.0500                                 | 1.2327    | 7.2381                                  | 0.0012    |                                |           |
| <b>Figure 3A</b> |                                         |           |                                         |           |                                         |           |                                         |           |                                |           |
|                  | <b>2 <math>\mu</math>M STA</b>          |           | <b>1 <math>\mu</math>M STA</b>          |           | <b>0.5 <math>\mu</math>M STA</b>        |           | <b>0.25 <math>\mu</math>M STA</b>       |           | <b>0 <math>\mu</math>M STA</b> |           |
| <b>Time</b>      | <b>Mean</b>                             | <b>SD</b> | <b>Mean</b>                             | <b>SD</b> | <b>Mean</b>                             | <b>SD</b> | <b>Mean</b>                             | <b>SD</b> | <b>Mean</b>                    | <b>SD</b> |
| 30 min           | 3.0051                                  | 0.3321    | 3.5554                                  | 0.3885    | 3.9183                                  | 0.0745    | 4.2407                                  | 0.0685    | 4.6052                         | 0.0000    |
| 20 min           | 3.1694                                  | 0.3080    | 3.8785                                  | 0.2297    | 3.9359                                  | 0.0519    | 4.2986                                  | 0.0755    | 4.6052                         | 0.0000    |
| 10 min           | 3.5615                                  | 0.2198    | 4.0515                                  | 0.1355    | 4.0778                                  | 0.1705    | 4.3386                                  | 0.0879    | 4.6052                         | 0.0000    |
| 5 min            | 4.0322                                  | 0.1220    | 4.1658                                  | 0.1597    | 4.2393                                  | 0.1871    | 4.4164                                  | 0.0627    | 4.6052                         | 0.0000    |
| 0 min            | 4.6052                                  | 0.0000    | 4.5902                                  | 0.0263    | 4.6010                                  | 0.0073    | 4.6010                                  | 0.0087    | 4.6052                         | 0.0000    |
| <b>Figure 4A</b> |                                         |           |                                         |           |                                         |           |                                         |           |                                |           |
|                  | <b>16 <math>\mu</math>M SIA</b>         |           | <b>8 <math>\mu</math>M SIA</b>          |           | <b>4 <math>\mu</math>M SIA</b>          |           | <b>2 <math>\mu</math>M SIA</b>          |           | <b>0 <math>\mu</math>M SIA</b> |           |
| <b>Time</b>      | <b>Mean</b>                             | <b>SD</b> | <b>Mean</b>                             | <b>SD</b> | <b>Mean</b>                             | <b>SD</b> | <b>Mean</b>                             | <b>SD</b> | <b>Mean</b>                    | <b>SD</b> |
| 30 min           | 4.0738                                  | 0.0015    | 4.1876                                  | 0.0077    | 4.2490                                  | 0.0142    | 4.3520                                  | 0.0200    | 4.6052                         | 0.0000    |

|                  |                |           |               |           |               |           |               |           |               |           |
|------------------|----------------|-----------|---------------|-----------|---------------|-----------|---------------|-----------|---------------|-----------|
| 20 min           | 4.2397         | 0.0074    | 4.2781        | 0.0201    | 4.3925        | 0.0448    | 4.4602        | 0.0351    | 4.6052        | 0.0000    |
| 10 min           | 4.3776         | 0.0019    | 4.3979        | 0.0093    | 4.4420        | 0.0329    | 4.5165        | 0.0465    | 4.6052        | 0.0000    |
| 5 min            | 4.4518         | 0.0063    | 4.5164        | 0.0047    | 4.5505        | 0.0164    | 4.5754        | 0.0186    | 4.6052        | 0.0000    |
| 0 min            | 4.6052         | 0.0000    | 4.6029        | 0.0023    | 4.6052        | 0.0000    | 4.6052        | 0.0000    | 4.6052        | 0.0000    |
| <b>Figure 4C</b> |                |           |               |           |               |           |               |           |               |           |
|                  | 16 $\mu$ M SIA |           | 8 $\mu$ M SIA |           | 4 $\mu$ M SIA |           | 2 $\mu$ M SIA |           | 0 $\mu$ M SIA |           |
| <b>Time</b>      | <b>Mean</b>    | <b>SD</b> | <b>Mean</b>   | <b>SD</b> | <b>Mean</b>   | <b>SD</b> | <b>Mean</b>   | <b>SD</b> | <b>Mean</b>   | <b>SD</b> |
| 30 min           | 4.1607         | 0.0015    | 4.2282        | 0.0077    | 4.2859        | 0.0142    | 4.3791        | 0.0200    | 4.6052        | 0.0000    |
| 20 min           | 4.2585         | 0.0074    | 4.4028        | 0.0201    | 4.4869        | 0.0448    | 4.4427        | 0.0351    | 4.6052        | 0.0000    |
| 10 min           | 4.3701         | 0.0019    | 4.4150        | 0.0093    | 4.5031        | 0.0329    | 4.5218        | 0.0465    | 4.6052        | 0.0000    |
| 5 min            | 4.4523         | 0.0063    | 4.4632        | 0.0047    | 4.4998        | 0.0164    | 4.5539        | 0.0186    | 4.6052        | 0.0000    |
| 0 min            | 4.5539         | 0.0000    | 4.6052        | 0.0023    | 4.6052        | 0.0000    | 4.6052        | 0.0000    | 4.6052        | 0.0000    |

**Table S2.** Optimized detection parameters and LC–MS/MS conditions

| <b>Analytes</b>                     | <b>MRM<br/>transition(m/z)</b> | <b>DP<br/>(V)</b> | <b>CE<br/>(V)</b> | <b>LLOQ<br/>(ng/ml)</b> | <b>Retention time<br/>(min)</b> |
|-------------------------------------|--------------------------------|-------------------|-------------------|-------------------------|---------------------------------|
| Tacrolimus                          | 821.5→768.6                    | 25                | 30                | 1                       | 3.75                            |
| Ascomycin                           | 810.7→757.6                    | 100               | 30                | —                       | 3.75                            |
| 6 $\beta$ -hydroxyl<br>testosterone | 305.3→269.2                    | 78                | 22                | 10                      | 2.79                            |
| Prednisolone                        | 361.3→343.2                    | 22                | 15                | —                       | 2.79                            |

**Table S3** Parameters used for PBPK modeling of schisantherin A and schisandrin A

| <b>Parameters</b>                         | <b>Schisantherin A</b> |                                      | <b>Schisandrin A</b> |                                      |
|-------------------------------------------|------------------------|--------------------------------------|----------------------|--------------------------------------|
|                                           | <b>Value</b>           | <b>Ref.</b>                          | <b>Value</b>         | <b>Ref.</b>                          |
| Molecular weight (g/mol)                  | 536.58                 | -                                    | 416.52               | -                                    |
| Compound type                             | neutral                | -                                    | neutral              | -                                    |
| Log $P_{o,w}$                             | 1.7                    | In-house data                        | 5.265                | [1]                                  |
| $f_u$ plasma                              | 0.083                  | [2]                                  | 0.0334               | [2]                                  |
| $f_u$ gut                                 | 1                      | default value                        | 1                    | default value                        |
| B/P                                       | 0.63                   | Predicted by Gastroplus <sup>®</sup> | 0.69                 | Predicted by Gastroplus <sup>®</sup> |
| Intrinsic solubility (mg/mL)              | 0.01                   | Predicted by Gastroplus <sup>®</sup> | 0.000668             | Predicted by Gastroplus <sup>®</sup> |
| $P_{app,caco-2}$ ( $\times 10^{-6}$ cm/s) | 34.41                  | [3]                                  |                      |                                      |

|                                                                     |    |                                  |       |                                                                                   |
|---------------------------------------------------------------------|----|----------------------------------|-------|-----------------------------------------------------------------------------------|
| PSA ( $\text{\AA}^2$ )                                              | -  |                                  | 55.38 | <a href="https://pubchem.ncbi.nlm.nih.gov/">https://pubchem.ncbi.nlm.nih.gov/</a> |
| HBD                                                                 | -  |                                  | 0     | <a href="https://pubchem.ncbi.nlm.nih.gov/">https://pubchem.ncbi.nlm.nih.gov/</a> |
| $K_p$                                                               |    |                                  |       |                                                                                   |
| Adipose                                                             |    |                                  | 36.4  |                                                                                   |
| Brain                                                               |    |                                  | 7.4   |                                                                                   |
| Gut                                                                 |    |                                  | 210.3 |                                                                                   |
| Heart                                                               | -  | Predicted by Simcyp <sup>®</sup> | 39.5  | In-house data                                                                     |
| Kidney                                                              |    |                                  | 5.9   |                                                                                   |
| Liver                                                               |    |                                  | 3.9   |                                                                                   |
| Lung                                                                |    |                                  | 19    |                                                                                   |
| Spleen                                                              |    |                                  | 7.6   |                                                                                   |
| $CL_{\text{int,HLM}}$ ( $\mu\text{L}/\text{min}/\text{mg}$ protein) | 24 | In-house data                    | 130   | In-house data                                                                     |

Note:  $\log P_{\text{o.w}}$ , octanol/water partition coefficient;  $f_u$ , fraction of unbound drug in plasma; B/P, blood to plasma partition ratio;  $P_{\text{app,caco-2}}$ , apparent permeability of Caco-2 cell line; PSA, polar surface area; HBD, hydrogen bond donors;  $K_p$ , tissue to plasma partition coefficients;  $CL_{\text{int,HLM}}$ , intrinsic clearance in human liver microsomes.

**Table S4** Parameters used for PBPK modeling of tacrolimus

| Parameter                                                                     | Tacrolimus                |                     |
|-------------------------------------------------------------------------------|---------------------------|---------------------|
|                                                                               | Value                     | Ref.                |
| Molecular weight (g/mol)                                                      | 804.02                    | Drug label          |
| Compound type                                                                 | neutral                   | Drug label          |
| $\log P_{\text{o.w}}$                                                         | 3.26                      | [4]                 |
| $f_u$ plasma                                                                  | 0.013                     | [4]                 |
| $f_u$ gut                                                                     | 1                         | [5]                 |
| B/P                                                                           | 35                        | [4]                 |
| Intrinsic solubility (mg/mL)                                                  | 0.012                     | [6]                 |
| $P_{\text{app,caco-2,pH 7.4:7.4,tacrolimus}}$ ( $\times 10^{-6}\text{cm/s}$ ) | 13.1                      | [7]                 |
| $P_{\text{app,caco-2,pH 7.4:7.4,midazolam}}$ ( $\times 10^{-6}\text{cm/s}$ )  | 32.4                      | [7]                 |
| CYP3A4 13-DMT $V_{\text{max}}$                                                | 8 pmol/min/pmol rCYP3A4   | [8]                 |
| CYP3A5 13-DMT $V_{\text{max}}$                                                | 17 pmol/min/pmol rCYP3A5  | [8]                 |
| CYP3A4 13-DMT $K_m$ , u                                                       | 0.21 $\mu\text{M}$        | [8]                 |
| CYP3A5 13-DMT $K_m$ , u                                                       | 0.21 $\mu\text{M}$        | [8]                 |
| CYP3A4 12-HT $V_{\text{max}}$                                                 | 0.6 pmol/min/pmol rCYP3A4 | [8]                 |
| CYP3A5 12-HT $V_{\text{max}}$                                                 | 1.4 pmol/min/pmol rCYP3A5 | [8]                 |
| CYP3A4 12-HT $K_m$ , u                                                        | 0.29 $\mu\text{M}$        | [8]                 |
| CYP3A5 12-HT $K_m$ , u                                                        | 0.35 $\mu\text{M}$        | [8]                 |
| CYP3A4/5 ISEF                                                                 | 0.24 (BD SUP)             | Simcyp <sup>®</sup> |
| $CL_R$ , human ( $\text{L}/\text{h}^{-1}$ )                                   | 0                         | [9]                 |

Note: Log  $P_{o,w}$ , octanol/water partition coefficient;  $f_u$ , fraction of unbound drug in plasma; B/P, blood to plasma partition ratio;  $P_{app,caco-2}$ , apparent permeability of Caco-2 cell line; 13-DMT, 13-O-desmethyl tacrolimus; 12-HT, 12-hydroxy tacrolimus;  $CL_R$ , renal clearance.

**Table S5**  $C_{max}$  and AUC of tacrolimus under different  $K_p$  values

| $K_p$    | CYP3A5 expresser           |                            | CYP3A5 non-expresser |               |
|----------|----------------------------|----------------------------|----------------------|---------------|
|          | $C_{max}^a$ (ng/mL)        | AUC <sup>b</sup> (ng/mL·h) | $C_{max}$ (ng/mL)    | AUC (ng/mL·h) |
| 250      | 16.10 (1.14 <sup>c</sup> ) | 137.27 (2.25)              | 25.84 (1.06)         | 216.28 (1.82) |
| 500      | 15.34 (1.09)               | 100.06 (1.64)              | 24.98 (1.03)         | 145.93 (1.23) |
| 750      | 15.11 (1.07)               | 82.37 (1.35)               | 24.71 (1.02)         | 117.92 (1.00) |
| 1000     | 14.99 (1.06)               | 72.04 (1.18)               | 24.58 (1.01)         | 102.80 (1.16) |
| Observed | 14.09                      | 60.83                      | 24.28                | 119.02        |

a  $C_{max}$ : Maximal blood concentration; b AUC: Area under the curve; c fold error

**Table S6** Demographic information used for PBPK modeling of tacrolimus

| Characteristics   | 1 mg tacrolimus   |                       | 2 mg tacrolimus   |                       | 5 mg tacrolimus   |                       |
|-------------------|-------------------|-----------------------|-------------------|-----------------------|-------------------|-----------------------|
|                   | CYP3A5 expressers | CYP3A5 non-expressers | CYP3A5 expressers | CYP3A5 non-expressers | CYP3A5 expressers | CYP3A5 non-expressers |
| Number (n)        | 12                | 26                    | 31                | 40                    | 12                | 12                    |
| Age (years)       | 23.0±1.0          | 23.0±3.3              | 23.0±1.7          | 23.0±1.8              | 24.0±1.4          | 21.0±0.5              |
| Sex (male/female) | Male 100%         |                       | Male 100%         |                       | Male 100%         |                       |
| Body weight (kg)  | 82.0±18.6         | 85.0±16.5             | 68.0±8.3          | 68.0±8.3              | 82.0±18.6         | 82.0±18.6             |
| Height (cm)       | 179.0±8.1         | 178.0±7.8             | 174.0±6.4         | 174.0±6.7             | 179.0±8.1         | 179.0±8.1             |
| Hematocrit (%)    | 44.0±2.7          | 43.0±3.0              | 46.0±4.0          | 46.0±3.8              | 44.0±2.7          | 44.0±2.7              |

## Reference

- Zhang M, Zheng J, Deng C, Song XM, Han L. Vinegar steam effect on oil - water partition coefficients of fructus schisandrae sphenantherae. Lishizhen Med Mater Med Res. 2012;23:2695-6.
- Liang Y, Zhou YY, Liu YN, Guan TY, Zheng X, Dai C, et al. Study on the plasma protein binding rate of Schisandra lignans based on the LC-IT-TOF/MS technique with relative quantitative analysis. Chin J Nat Med. 2013;11:442-8.
- Qin XL, Chen X, Zhong GP, Fan XM, Wang Y, Xue XP, et al. Effect of Tacrolimus on the pharmacokinetics of bioactive lignans of Wuzhi tablet (Schisandra sphenanthera extract) and the potential roles of CYP3A and P-gp. Phytomedicine. 2014;21:766-72.
- Gertz M, Houston JB, Galetin A. Physiologically based pharmacokinetic modeling of intestinal first-pass metabolism of CYP3A substrates with high intestinal extraction. Drug Metab Dispos. 2011;39:1633-42.

5. Barter ZE, Perrett HF, Yeo KR, Allorge D, Lennard MS, Rostami-Hodjegan A. Determination of a quantitative relationship between hepatic CYP3A5\*1/\*3 and CYP3A4 expression for use in the prediction of metabolic clearance in virtual populations. *Biopharm Drug Dispos.* 2010;31:516-32.
6. Tamura S, Tokunaga Y, Ibuki R, Amidon GL, Sezaki H, Yamashita S. The site-specific transport and metabolism of tacrolimus in rat small intestine. *J Pharmacol Exp Ther.* 2003;306:310-6.
7. Gertz M, Harrison A, Houston JB, Galetin A. Prediction of human intestinal first-pass metabolism of 25 CYP3A substrates from in vitro clearance and permeability data. *Drug Metab Dispos.* 2010;38:1147-58.
8. Dai Y, Hebert MF, Isoherranen N, Davis CL, Marsh C, Shen DD, et al. Effect of CYP3A5 polymorphism on tacrolimus metabolic clearance in vitro. *Drug Metab Dispos.* 2006;34:836-47.
9. Bekersky I, Dressler D, Alak A, Boswell GW, Mekki QA. Comparative tacrolimus pharmacokinetics: normal versus mildly hepatically impaired subjects. *J Clin Pharmacol.* 2001;41:628-35
